# Supplementary material for: Identification of Beef Heifers with Superior Uterine Capacity for Pregnancy
Source: PubMed Central journal article supplement — Biol Reprod. 2016 Jul 14;95(2):47. doi: 10.1095/biolreprod.116.141390 (PMC5029478; doi:10.1095/biolreprod.116.141390), 2016-07-14

GEARY ET AL., SUPPLEMENTAL FIG. S1. Conditional boxplots and violin plots of data obtained from edgeR-robust analysis of endometrial biopsy RNA sequencing data. **A)** Conditional boxplots showing gene expression levels of one fertility group versus another. **B)** Violin plots showing distribution of  $\log_2$  fold changes (logFC) in gene expression in one fertility group versus another relative to read counts ( $\log_2$  counts per million). Note that when IF group is used in the comparison, the distribution shifts towards negative values of logFC indicating that most of the differentially expressed genes are lowly expressed in IF as compared to either SF or HF heifers.

**A**

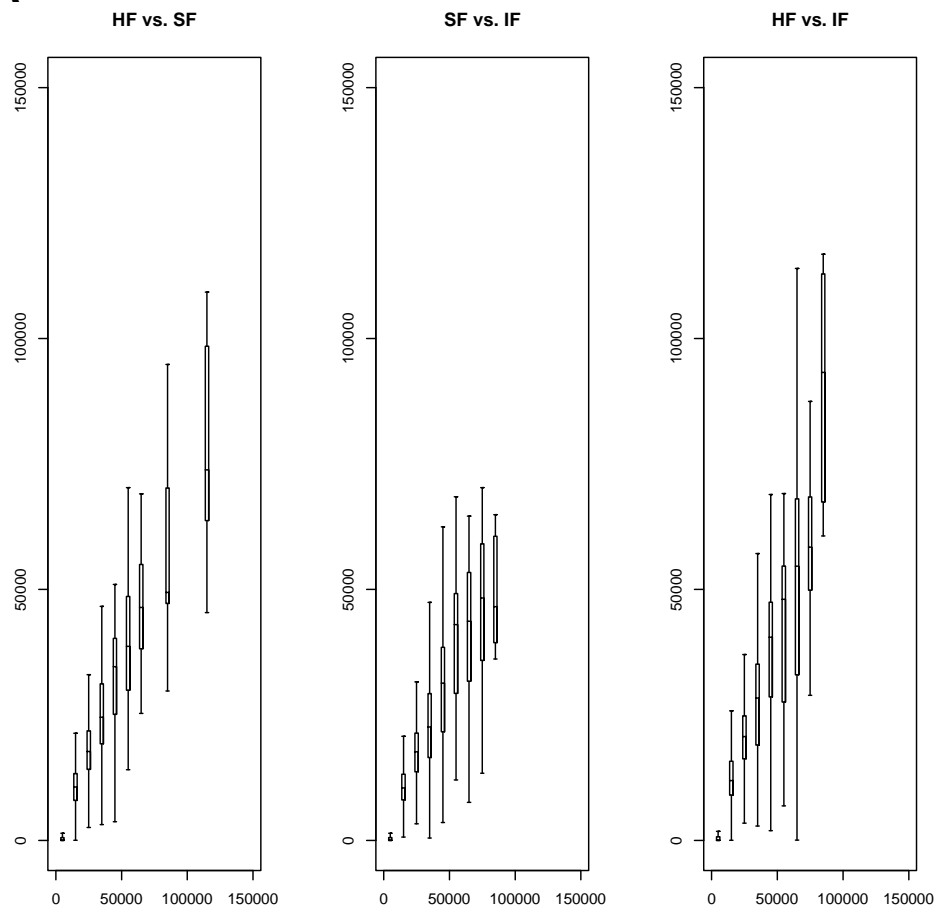

**B**

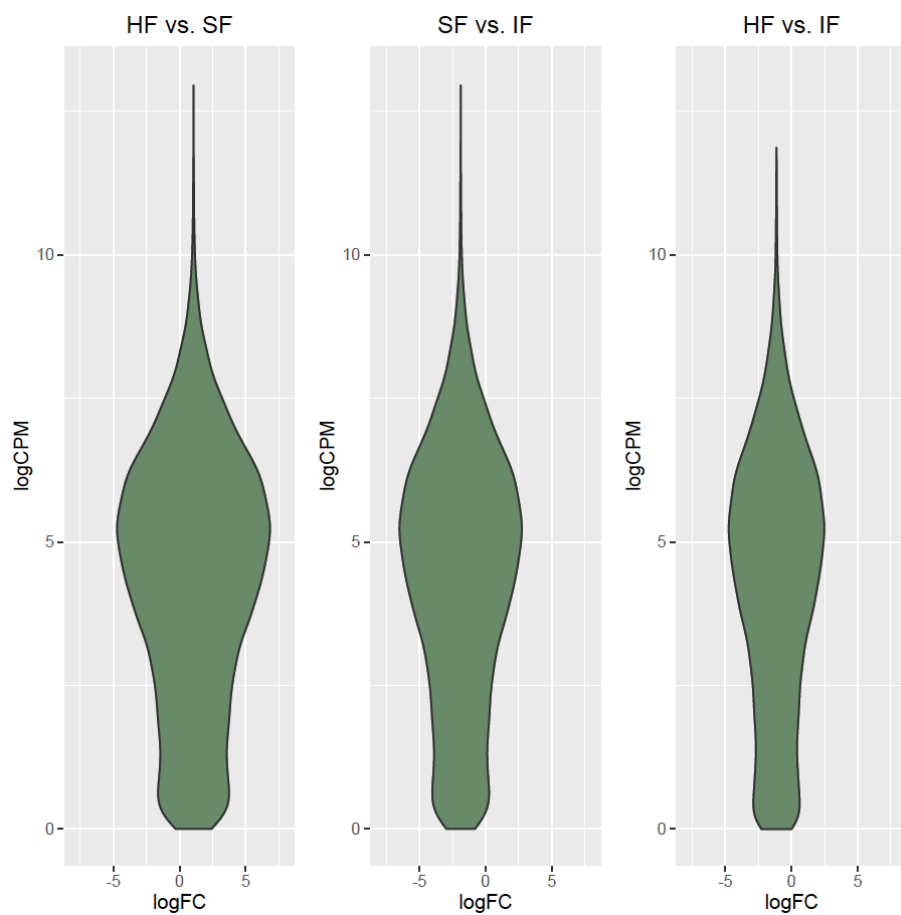

Supplement: supp_116.141390_biolreprod.116.141390-1.pdf [file supp_116.141390_biolreprod.116.141390-1.pdf]
